# Supplementary material for: Biomass-derived graphene modified γ-Fe2O3/N,Fe–TiO2@GO: a prolific photoactive material with extended visible to near IR harvesting
Source: Royal Society of Chemistry journal article supplement (doi:10.1039/d2cy01502a), 2023-01-01
Supplement: d2cy01502a1.pdf [file d2cy01502a1.pdf]

## Biomass derived graphene modified $\gamma\text{-Fe}_2\text{O}_3/\text{N,Fe-TiO}_2@\text{GO}$ – A prolific photoactive material with extended visible to near IR harvesting

Manpreet Kaur,<sup>a</sup> Abhishek Charak,<sup>b</sup> Sofia Sandhu<sup>a</sup>, Amrit Pal Toor<sup>c,d</sup> Vasundhara Singh<sup>a\*</sup>

<sup>a</sup>Department of Applied Sciences, Punjab Engineering College (Deemed to be University), Sector-12, Chandigarh, India

<sup>b</sup>Department of Industrial and Production Engineering, Punjab Engineering College (Deemed to be University), Sector-12, Chandigarh, India

<sup>c</sup>Dr. SSB, University Institute of Chemical Engineering & Technology, Panjab University, Chandigarh, India

<sup>d</sup>Energy Research Centre, Panjab University, Chandigarh, India

\*Email: [vasun7@yahoo.co.in](mailto:vasun7@yahoo.co.in); [vasundhara@pec.edu.in](mailto:vasundhara@pec.edu.in)

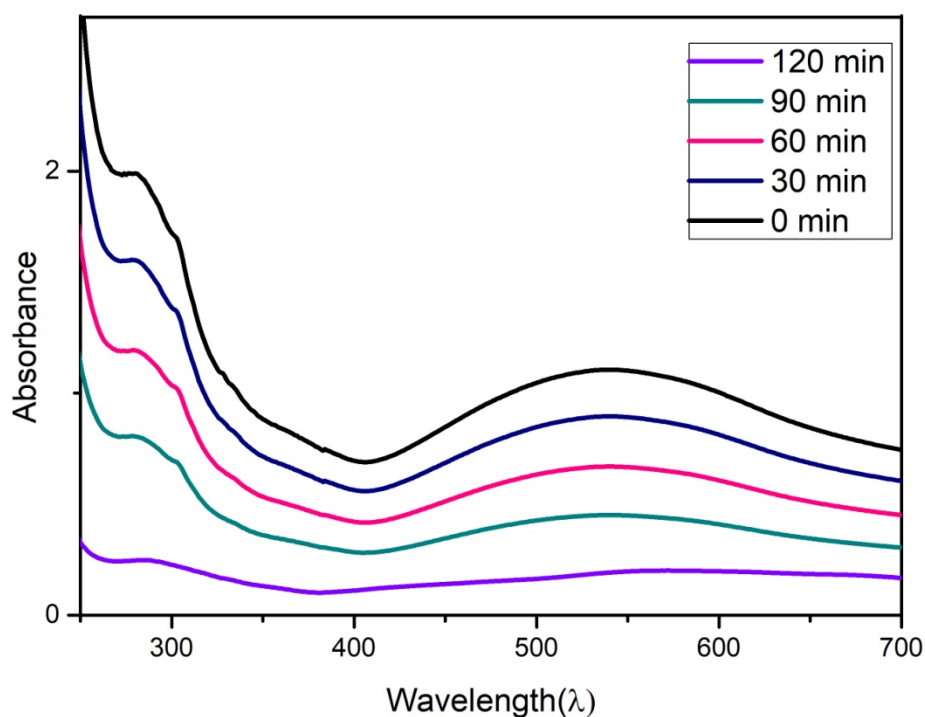

Fig S1- UV-Vis spectra of synthetic dye solution at different interval degradation time

**Table S1. The 3-factor face centered composite design matrix and the value of response function.**

| Std | Run | Factor 1<br>A:Initial<br>Concentration<br>mg/L | Factor 2<br>B:Catalyst<br>Loading<br>g/L | Factor 3<br>C:pH | Factor 4<br>D:H2O2<br>ml/L | Response 1<br>Degradation<br>% | Response 2<br>COD<br>Reduction<br>% |
|-----|-----|------------------------------------------------|------------------------------------------|------------------|----------------------------|--------------------------------|-------------------------------------|
| 1   | 14  | 20                                             | 0.6                                      | 2                | 0.5                        | 80.3                           | 61.5                                |
| 2   | 5   | 60                                             | 0.6                                      | 2                | 0.5                        | 73.2                           | 46                                  |
| 3   | 24  | 20                                             | 1.2                                      | 2                | 0.5                        | 84.5                           | 63                                  |
| 4   | 3   | 60                                             | 1.2                                      | 2                | 0.5                        | 79                             | 54                                  |
| 5   | 10  | 20                                             | 0.6                                      | 8                | 0.5                        | 62                             | 46                                  |
| 6   | 22  | 60                                             | 0.6                                      | 8                | 0.5                        | 75.6                           | 56                                  |
| 7   | 4   | 20                                             | 1.2                                      | 8                | 0.5                        | 74.5                           | 53                                  |
| 8   | 1   | 60                                             | 1.2                                      | 8                | 0.5                        | 87.9                           | 69                                  |
| 9   | 15  | 20                                             | 0.6                                      | 2                | 1.5                        | 85.6                           | 66                                  |
| 10  | 29  | 60                                             | 0.6                                      | 2                | 1.5                        | 85.6                           | 63                                  |
| 11  | 26  | 20                                             | 1.2                                      | 2                | 1.5                        | 80.3                           | 57                                  |
| 12  | 2   | 60                                             | 1.2                                      | 2                | 1.5                        | 78.3                           | 61.5                                |
| 13  | 6   | 20                                             | 0.6                                      | 8                | 1.5                        | 56.3                           | 32                                  |
| 14  | 16  | 60                                             | 0.6                                      | 8                | 1.5                        | 78                             | 54                                  |
| 15  | 25  | 20                                             | 1.2                                      | 8                | 1.5                        | 58                             | 27.5                                |
| 16  | 11  | 60                                             | 1.2                                      | 8                | 1.5                        | 79.3                           | 57                                  |
| 17  | 13  | 60                                             | 0.9                                      | 5                | 1                          | 89.4                           | 77                                  |
| 18  | 20  | 80                                             | 0.9                                      | 5                | 1                          | 63.5                           | 52                                  |
| 19  | 18  | 40                                             | 0.3                                      | 5                | 1                          | 84.3                           | 65                                  |
| 20  | 21  | 40                                             | 1.5                                      | 5                | 1                          | 89                             | 69                                  |
| 21  | 17  | 40                                             | 0.9                                      | 8                | 1                          | 88.5                           | 71                                  |
| 22  | 7   | 40                                             | 0.9                                      | 11               | 1                          | 72.5                           | 41                                  |
| 23  | 28  | 40                                             | 0.9                                      | 5                | 0                          | 78.6                           | 57.5                                |
| 24  | 30  | 40                                             | 0.9                                      | 5                | 2                          | 72.3                           | 49.5                                |
| 25  | 27  | 40                                             | 0.9                                      | 5                | 1                          | 100                            | 85                                  |
| 26  | 9   | 40                                             | 0.9                                      | 8                | 1                          | 86.4                           | 71                                  |
| 27  | 8   | 40                                             | 0.9                                      | 5                | 1.5                        | 91.1                           | 74                                  |
| 28  | 23  | 40                                             | 0.9                                      | 5                | 1                          | 100                            | 84.5                                |
| 29  | 19  | 40                                             | 0.9                                      | 5                | 1                          | 100                            | 85.5                                |
| 30  | 12  | 40                                             | 0.9                                      | 2                | 1                          | 97.3                           | 80                                  |

**Table S2- ANOVA for Quadratic model Response 1: Degradation**

| Source                  | Sum of Squares | df | Mean Square | F-value | p-value  |             |
|-------------------------|----------------|----|-------------|---------|----------|-------------|
| <b>Model</b>            | 3862.93        | 14 | 275.92      | 111.25  | < 0.0001 | significant |
| A-Initial Concentration | 181.40         | 1  | 181.40      | 73.14   | < 0.0001 |             |
| B-Catalyst Loading      | 49.88          | 1  | 49.88       | 20.11   | 0.0004   |             |
| C-pH                    | 456.55         | 1  | 456.55      | 184.07  | < 0.0001 |             |

|                  |         |    |         |        |          |                 |
|------------------|---------|----|---------|--------|----------|-----------------|
| D-H2O2           | 35.11   | 1  | 35.11   | 14.16  | 0.0019   |                 |
| AB               | 0.0625  | 1  | 0.0625  | 0.0252 | 0.8760   |                 |
| AC               | 447.32  | 1  | 447.32  | 180.35 | < 0.0001 |                 |
| AD               | 44.22   | 1  | 44.22   | 17.83  | 0.0007   |                 |
| BC               | 57.76   | 1  | 57.76   | 23.29  | 0.0002   |                 |
| BD               | 123.21  | 1  | 123.21  | 49.68  | < 0.0001 |                 |
| CD               | 106.09  | 1  | 106.09  | 42.77  | < 0.0001 |                 |
| A <sup>2</sup>   | 1590.63 | 1  | 1590.63 | 641.30 | < 0.0001 |                 |
| B <sup>2</sup>   | 198.18  | 1  | 198.18  | 79.90  | < 0.0001 |                 |
| C <sup>2</sup>   | 233.42  | 1  | 233.42  | 94.11  | < 0.0001 |                 |
| D <sup>2</sup>   | 797.15  | 1  | 797.15  | 321.39 | < 0.0001 |                 |
| <b>Residual</b>  | 37.20   | 15 | 2.48    |        |          |                 |
| Lack of Fit      | 35.00   | 12 | 2.92    | 3.97   | 0.1416   | not significant |
| Pure Error       | 2.20    | 3  | 0.7350  |        |          |                 |
| <b>Cor Total</b> | 3900.13 | 29 |         |        |          |                 |

### Final Equation of Degradation in Terms of Coded Factors

$$\text{Degradation} = 98.12 + 3.24A + 1.11B - 4.82C - 1.19D - 0.0625AB + 5.29AC + 1.66AD + 1.90BC - 2.77BD - 10.07A^2 - 2.71B^2 - 4C^2 - 5.51D^2 \text{ (S1)}$$

Table S3- ANOVA for Quadratic model Response 2: COD Reduction

| Source                  | Sum of Squares | Df | Mean Square | F-value | p-value  |                 |
|-------------------------|----------------|----|-------------|---------|----------|-----------------|
| <b>Model</b>            | 6145.25        | 14 | 438.95      | 1486.70 | < 0.0001 | significant     |
| A-Initial Concentration | 194.08         | 1  | 194.08      | 657.33  | < 0.0001 |                 |
| B-Catalyst Loading      | 27.09          | 1  | 27.09       | 91.77   | < 0.0001 |                 |
| C-pH                    | 453.45         | 1  | 453.45      | 1535.83 | < 0.0001 |                 |
| D-H2O2                  | 96.13          | 1  | 96.13       | 325.60  | < 0.0001 |                 |
| AB                      | 47.27          | 1  | 47.27       | 160.09  | < 0.0001 |                 |
| AC                      | 631.27         | 1  | 631.27      | 2138.08 | < 0.0001 |                 |
| AD                      | 165.77         | 1  | 165.77      | 561.45  | < 0.0001 |                 |
| BC                      | 23.77          | 1  | 23.77       | 80.49   | < 0.0001 |                 |
| BD                      | 107.64         | 1  | 107.64      | 364.58  | < 0.0001 |                 |
| CD                      | 365.77         | 1  | 365.77      | 1238.84 | < 0.0001 |                 |
| A <sup>2</sup>          | 1499.57        | 1  | 1499.57     | 5079.02 | < 0.0001 |                 |
| B <sup>2</sup>          | 504.56         | 1  | 504.56      | 1708.95 | < 0.0001 |                 |
| C <sup>2</sup>          | 1040.00        | 1  | 1040.00     | 3522.45 | < 0.0001 |                 |
| D <sup>2</sup>          | 1559.04        | 1  | 1559.04     | 5280.44 | < 0.0001 |                 |
| <b>Residual</b>         | 4.43           | 15 | 0.2952      |         |          |                 |
| Lack of Fit             | 3.93           | 12 | 0.3274      | 1.96    | 0.3165   | not significant |
| Pure Error              | 0.5000         | 3  | 0.1667      |         |          |                 |
| <b>Cor Total</b>        | 6149.68        | 29 |             |         |          |                 |

### Final Equation of COD Reduction in Terms of Coded Factors

$$\text{COD Reduction} = 84.36 + 3.35A + 106B - 4.81C - 1.97D + 1.72AB + 6.28AC + 3.22AD + 1.22BC - 2.59BD - 4.78CD + 9.78A^2 - 4.32B^2 - 8.45C^2 - 7.71D^2 \quad (S_2)$$

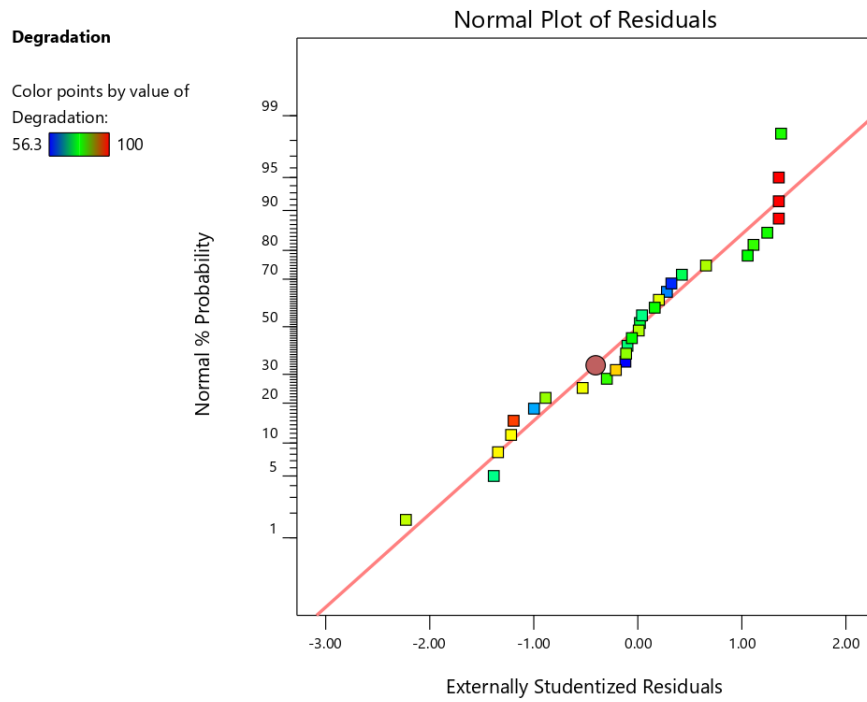

**Fig S2- Normal vs predicted graph of Response 1 degradation**

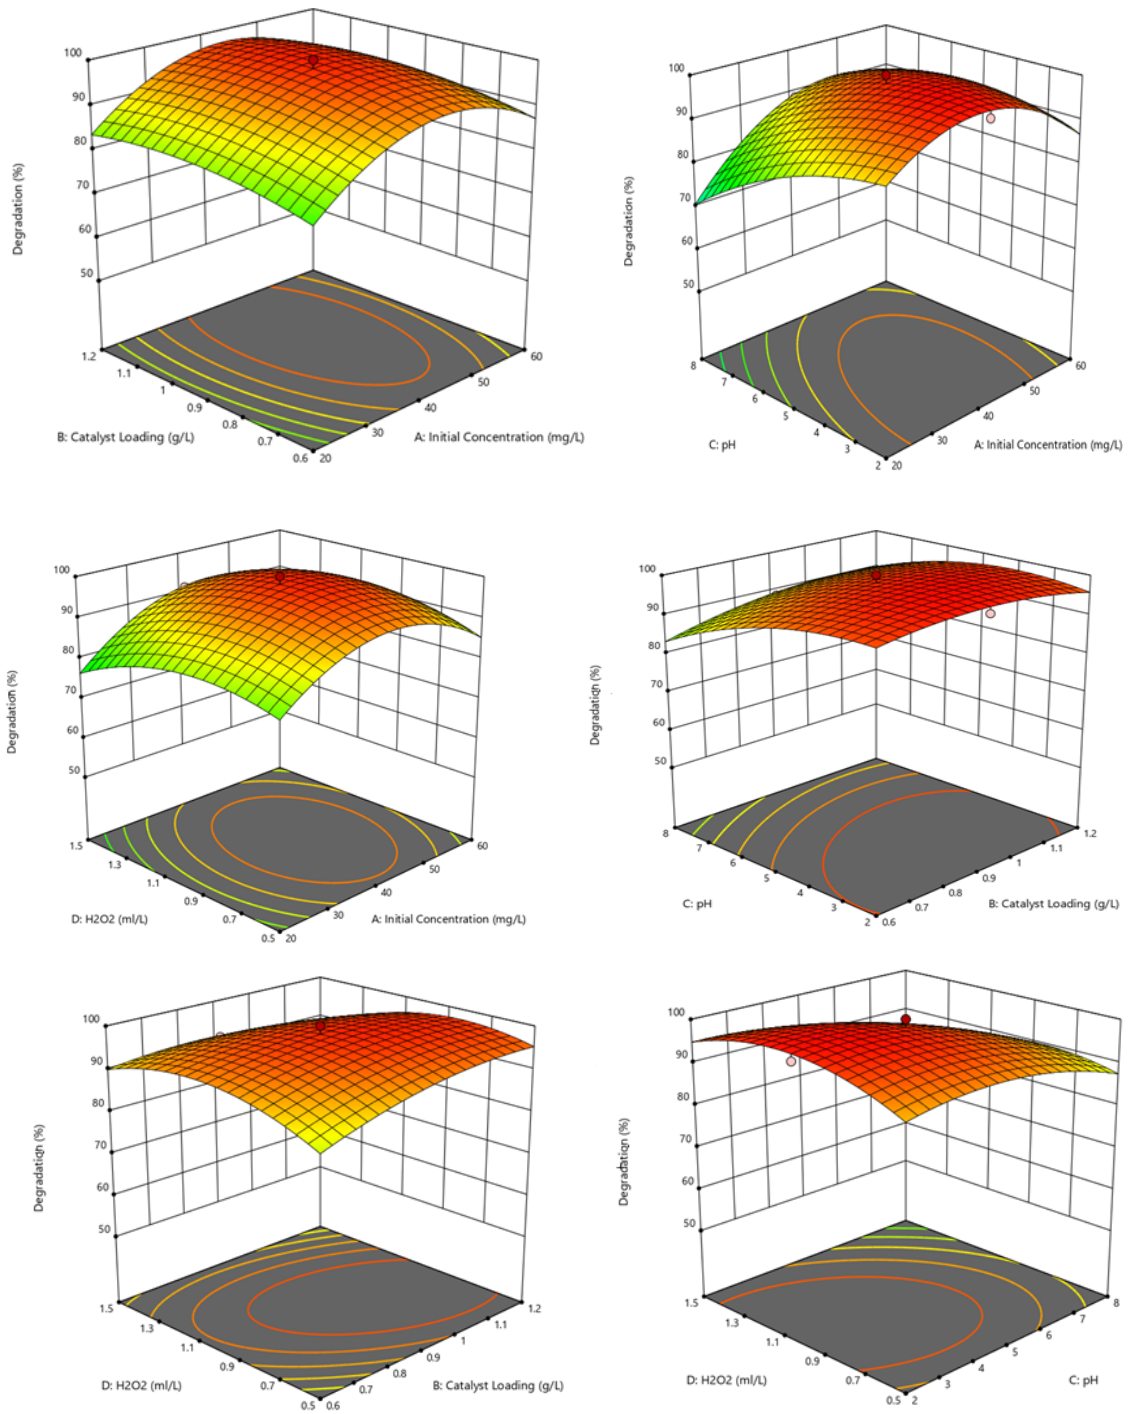

**Fig S3- Response surface plot of response 1, degradation of mixed dyes**

**COD Reduction**

Color points by value of  
COD Reduction:  
27.5  85.5

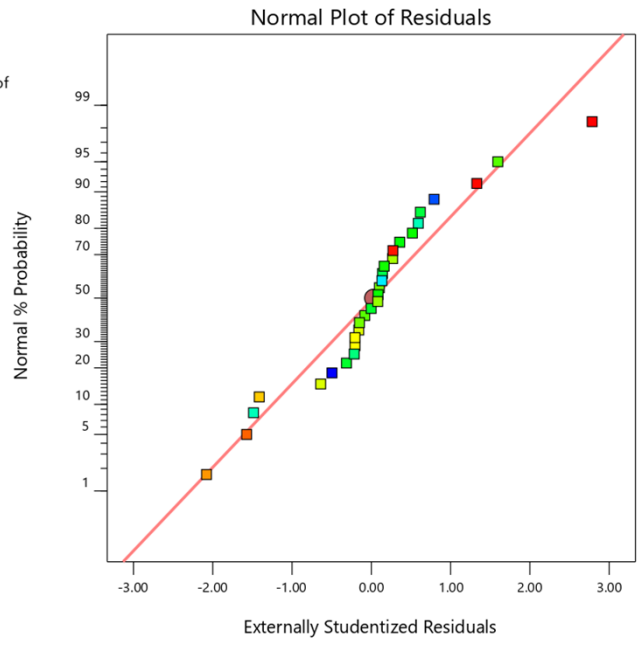

**Fig S4- Normal vs predicted graph of Response 2 COD reduction**

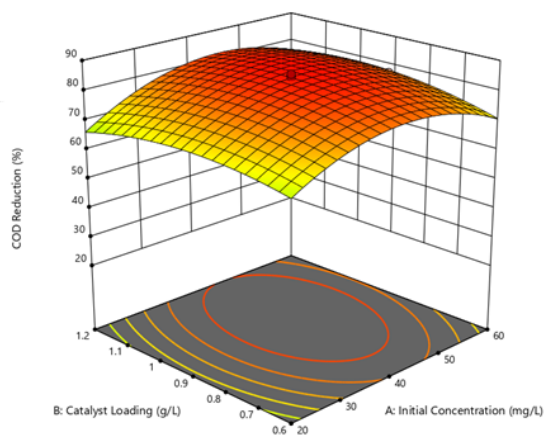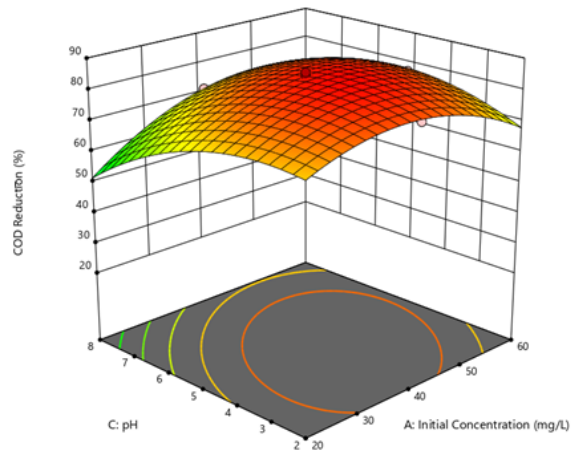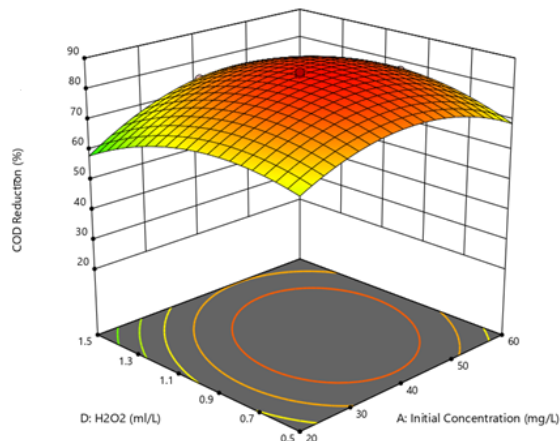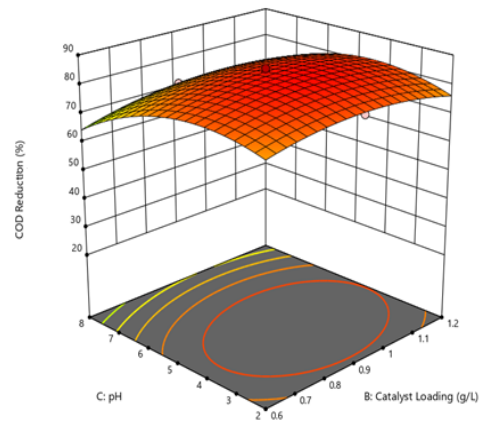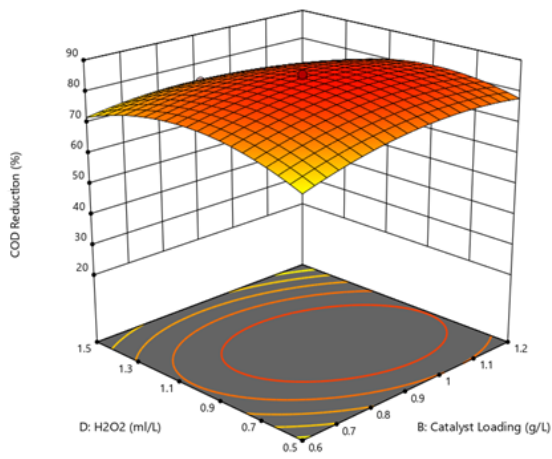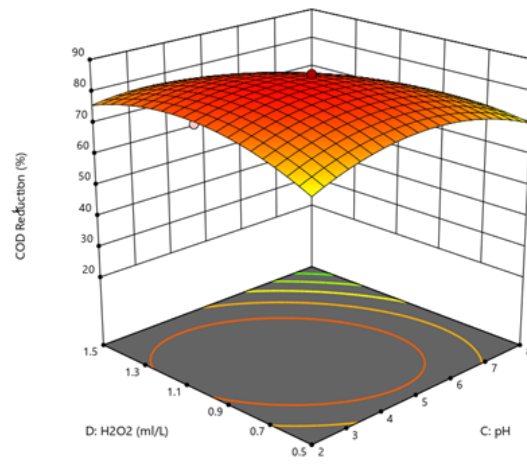

**Fig. S5 Response surface plot of response 2, COD reduction**

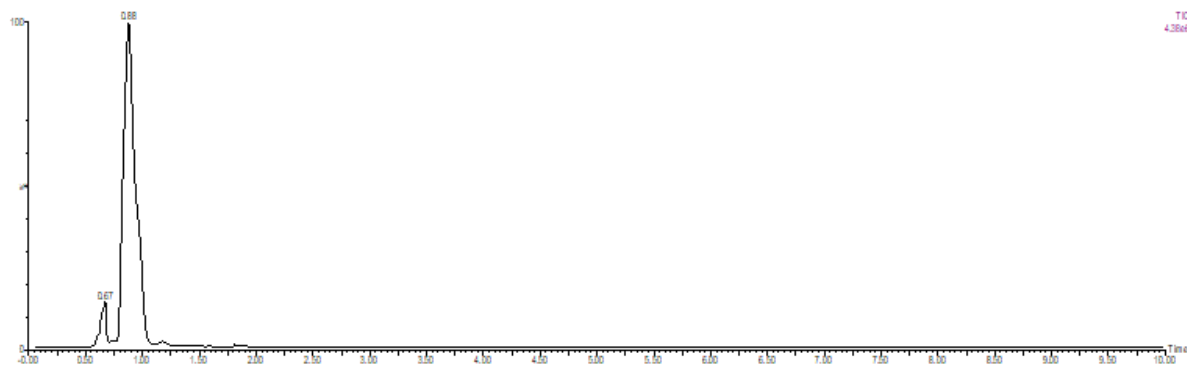

Fig S6- LC chromatogram of Mixed disperse dye after 120 min of degradation

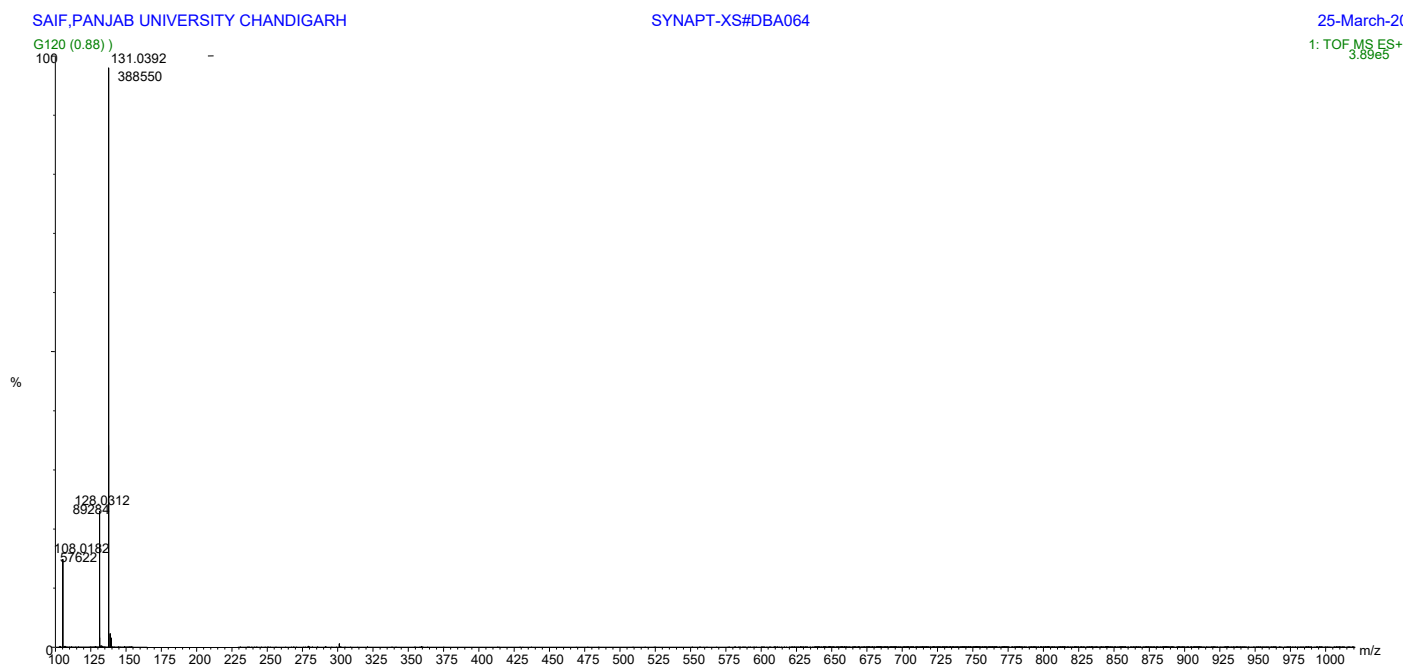

Fig S7. MS spectra of the mixture of disperse dye by  $\square$  Fe<sub>2</sub>O<sub>3</sub>/N, Fe-TiO<sub>2</sub>@1.5%GO after 120 min of degradation at RT=0.67, m/z=131.03



G: 120.95 (0.67)

1: TOF MS ES  
1.8965

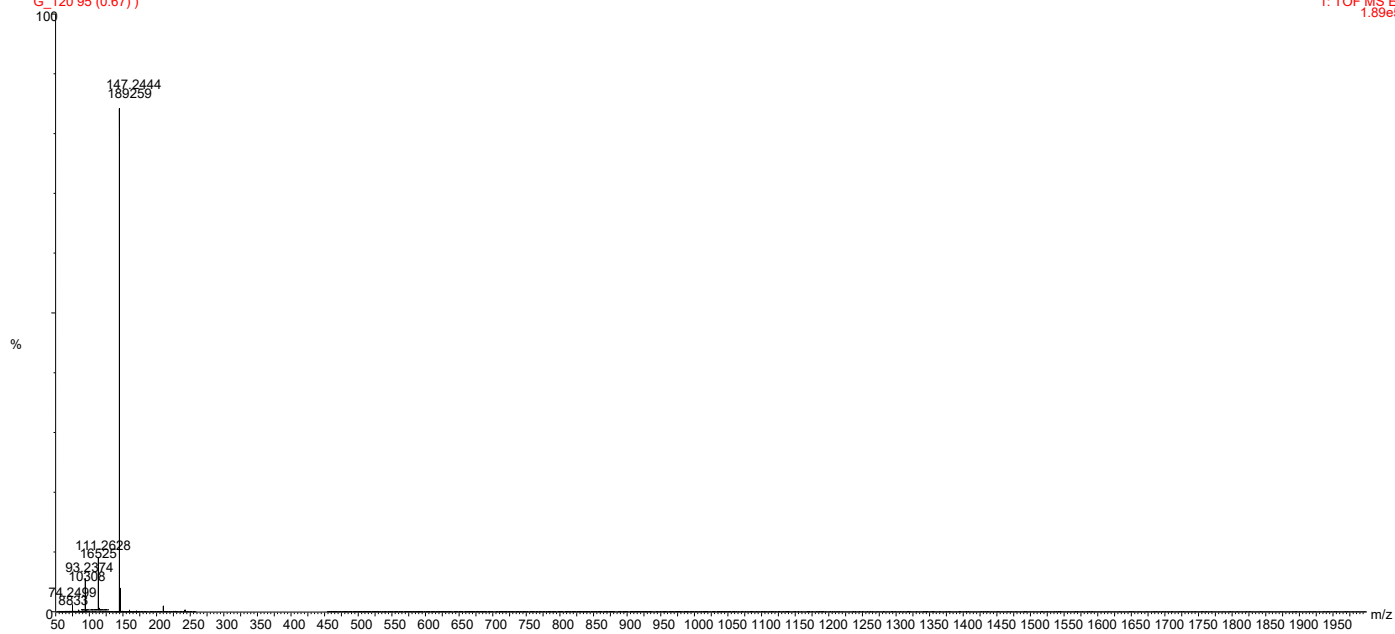

**Fig S8. MS spectra of the mixture of disperse dye by  $\square$  Fe<sub>2</sub>O<sub>3</sub>/N, Fe-TiO<sub>2</sub>@1.5%GO after 120 min of degradation at RT-0.88, m/z=147.24**
